# Supplementary material for: A Short Double-Stapled Peptide Inhibits Respiratory Syncytial Virus Entry and Spreading
Source: PubMed Central journal article supplement (PMC5365662; doi:10.1128/aac.02241-16), 2017-03-24
Supplement: AAC.02241-16_zac004176043s1.pdf [file AAC.02241-16_zac004176043s1.pdf]

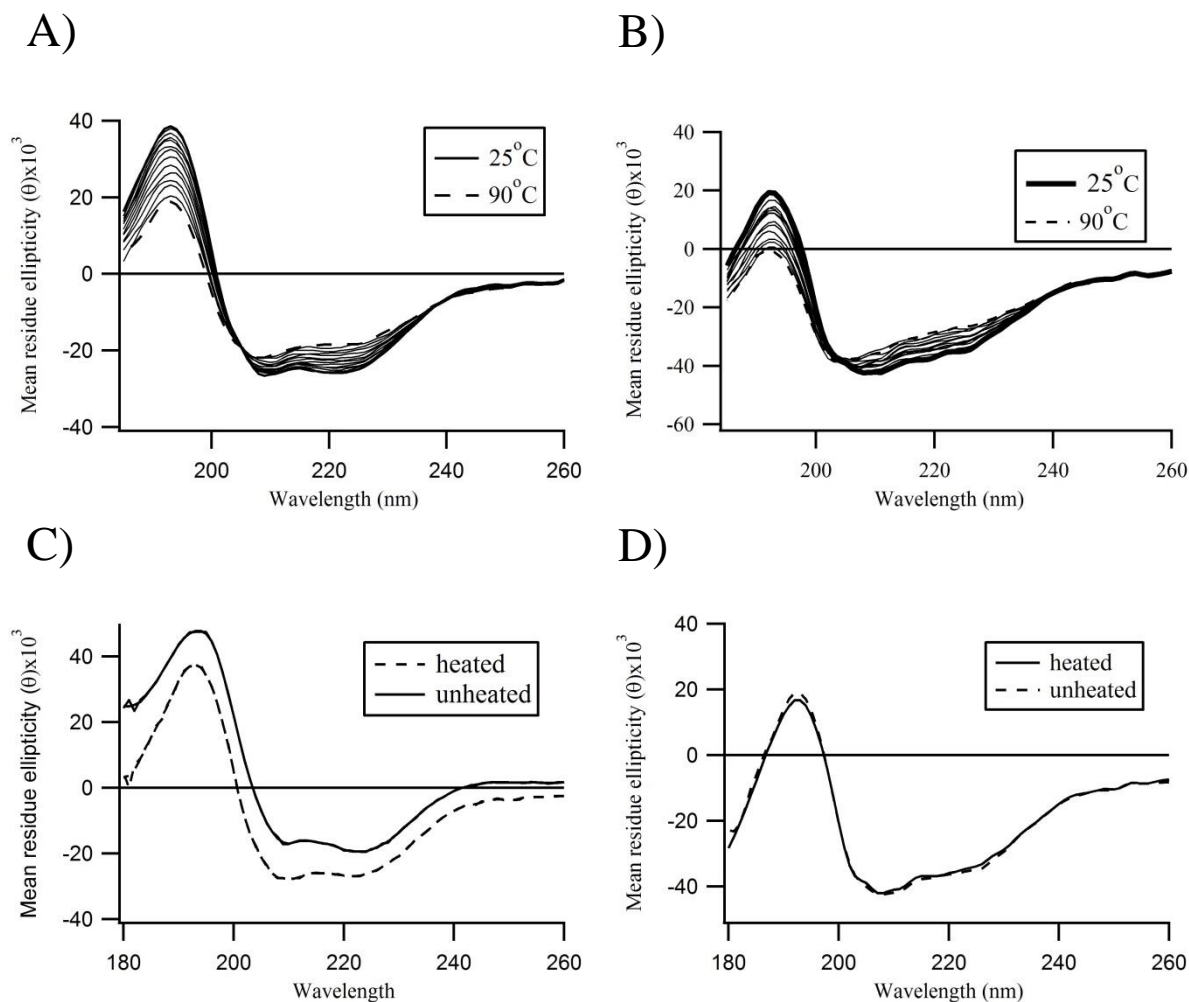

**Figure S1.** Temperature dependent circular dichroism spectra of peptide **4ca** at a peptide concentration of A) 50  $\mu$ M and B) 25  $\mu$ M. The cell holding the sample was heating at the desired temperature and the CD spectra was measured as described in material and methods. The temperature was increased from 25°C to 90°C by 5°C increments. Panel C) and D) are the CD curve performed at 25°C prior to increase the temperature (unheated) and after letting the sample heated at 90°C (heated) cool down to 25°C.
